# Supplementary material for: Monomeric, dimeric and hexameric resorcin[4]arene assemblies with alcohols in apolar solvents
Source: Royal Society of Chemistry journal article supplement (doi:10.1039/b803890b), 2008-01-01

Electronic supplementary information (ESI) for:

**Monomeric, dimeric and hexameric  
resorcin[4]arene assemblies with alcohols in  
apolar solvents**

Bjoern Schnatwinkel, Ion Stoll, Andreas Mix, Mikhail V. Rekharsky,  
Victor V. Borovkov, Yoshihisa Inoue and Jochen Mattay\*

1a\*3 1:1 Complex

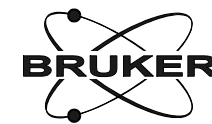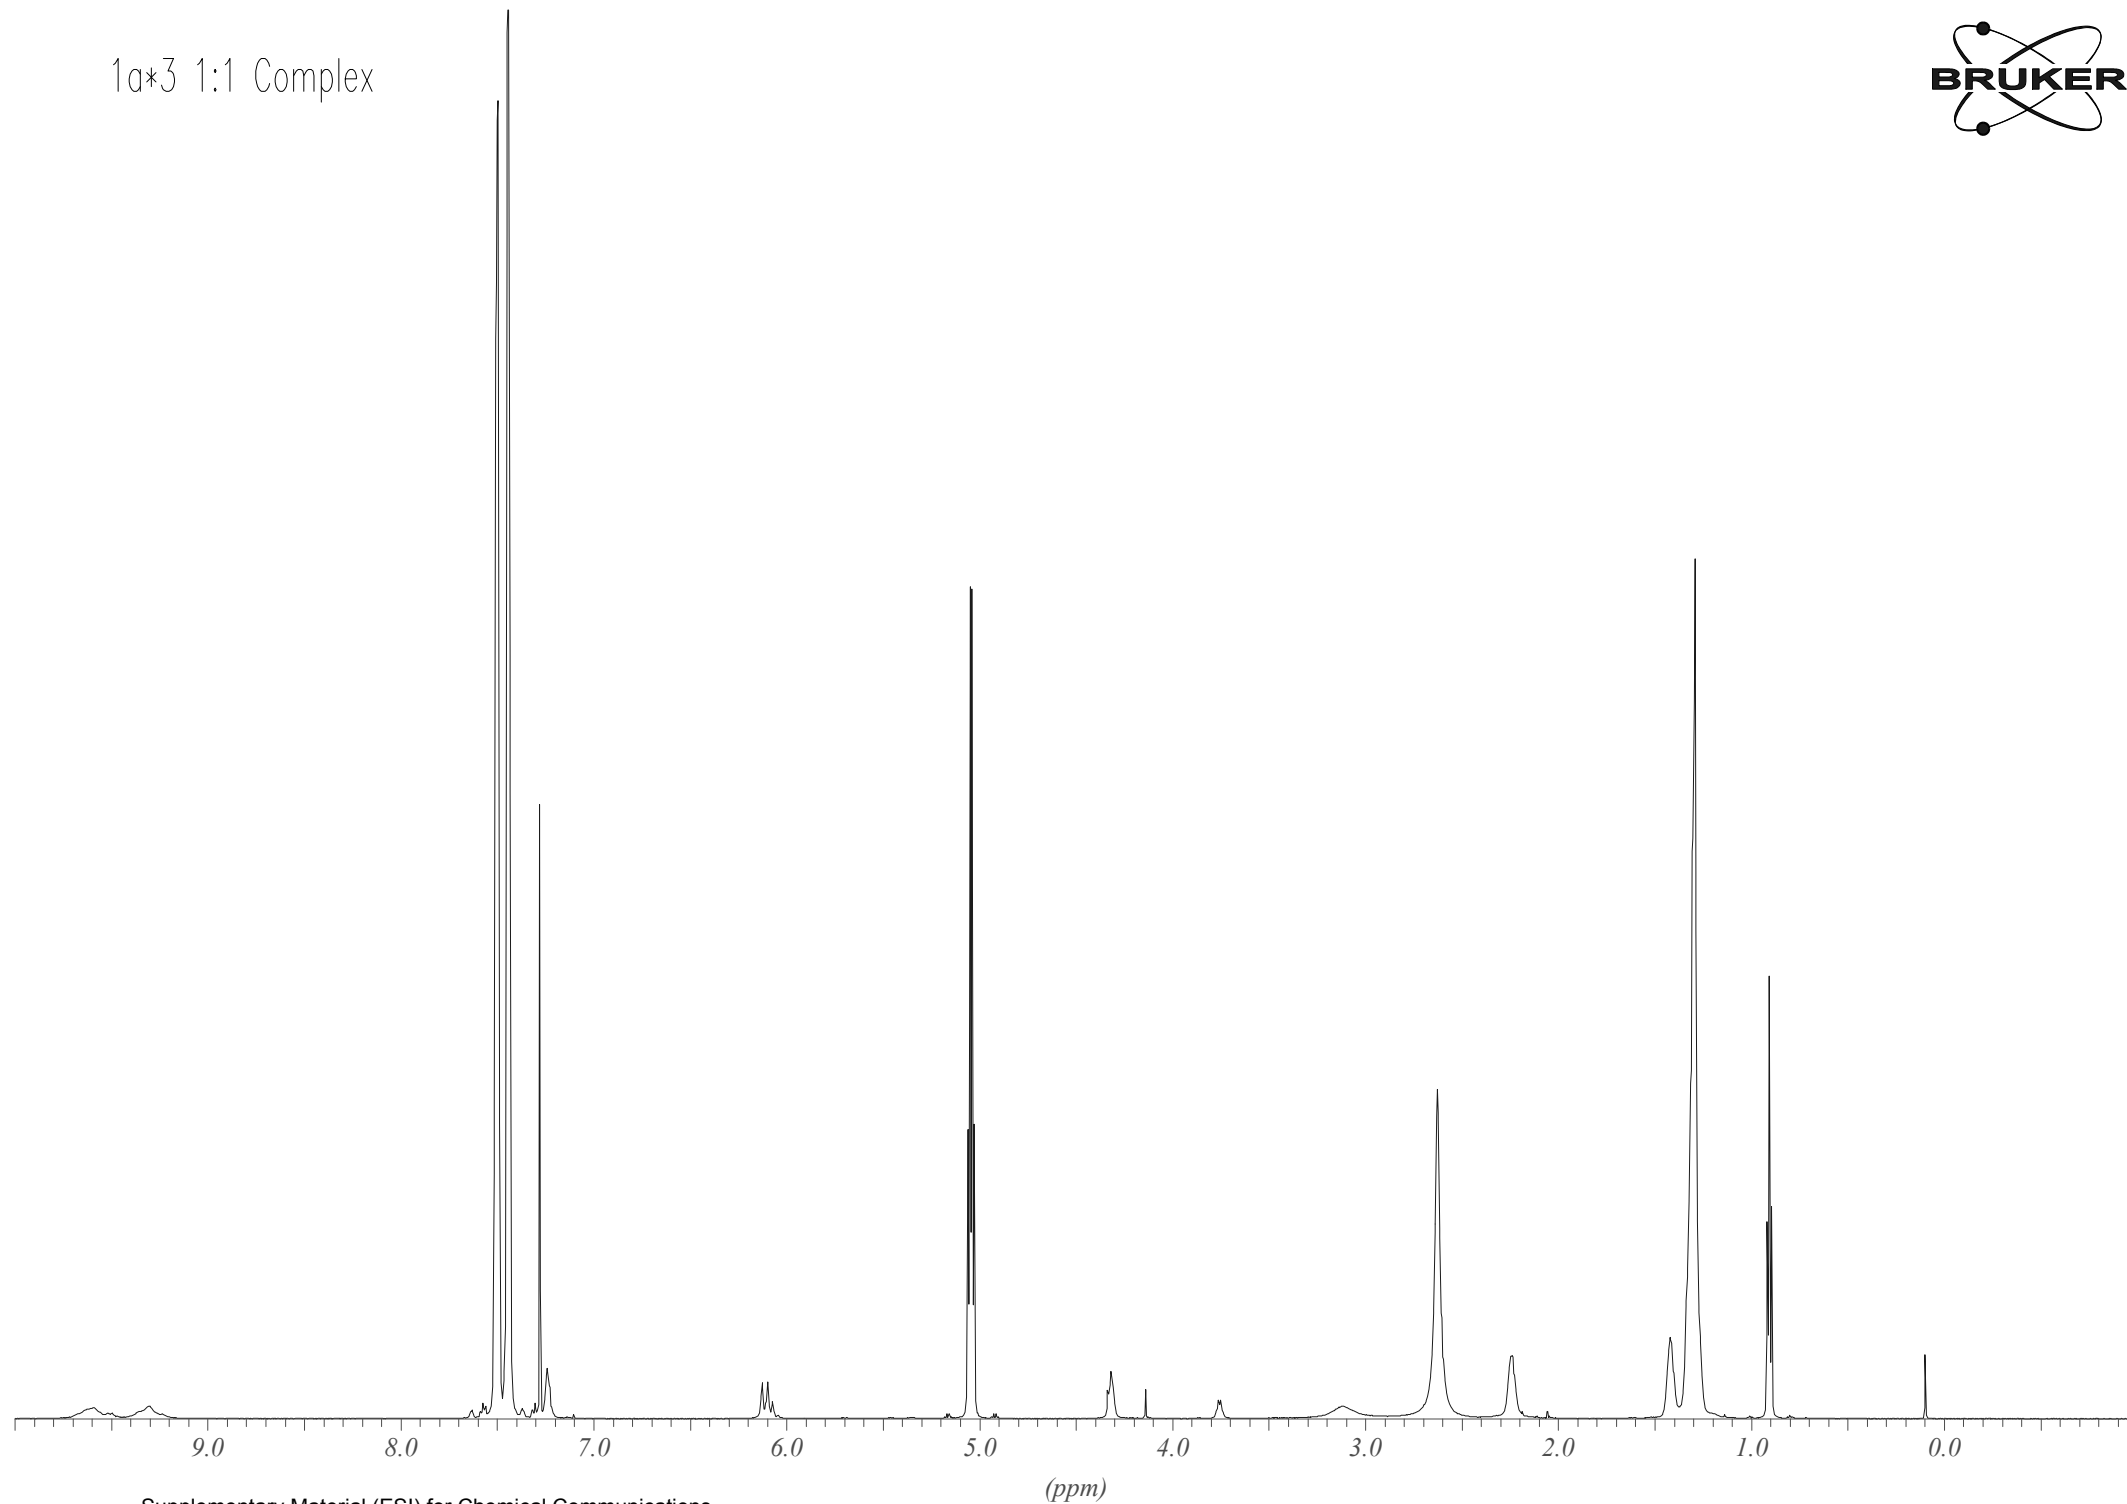

1a\*4 Dimer

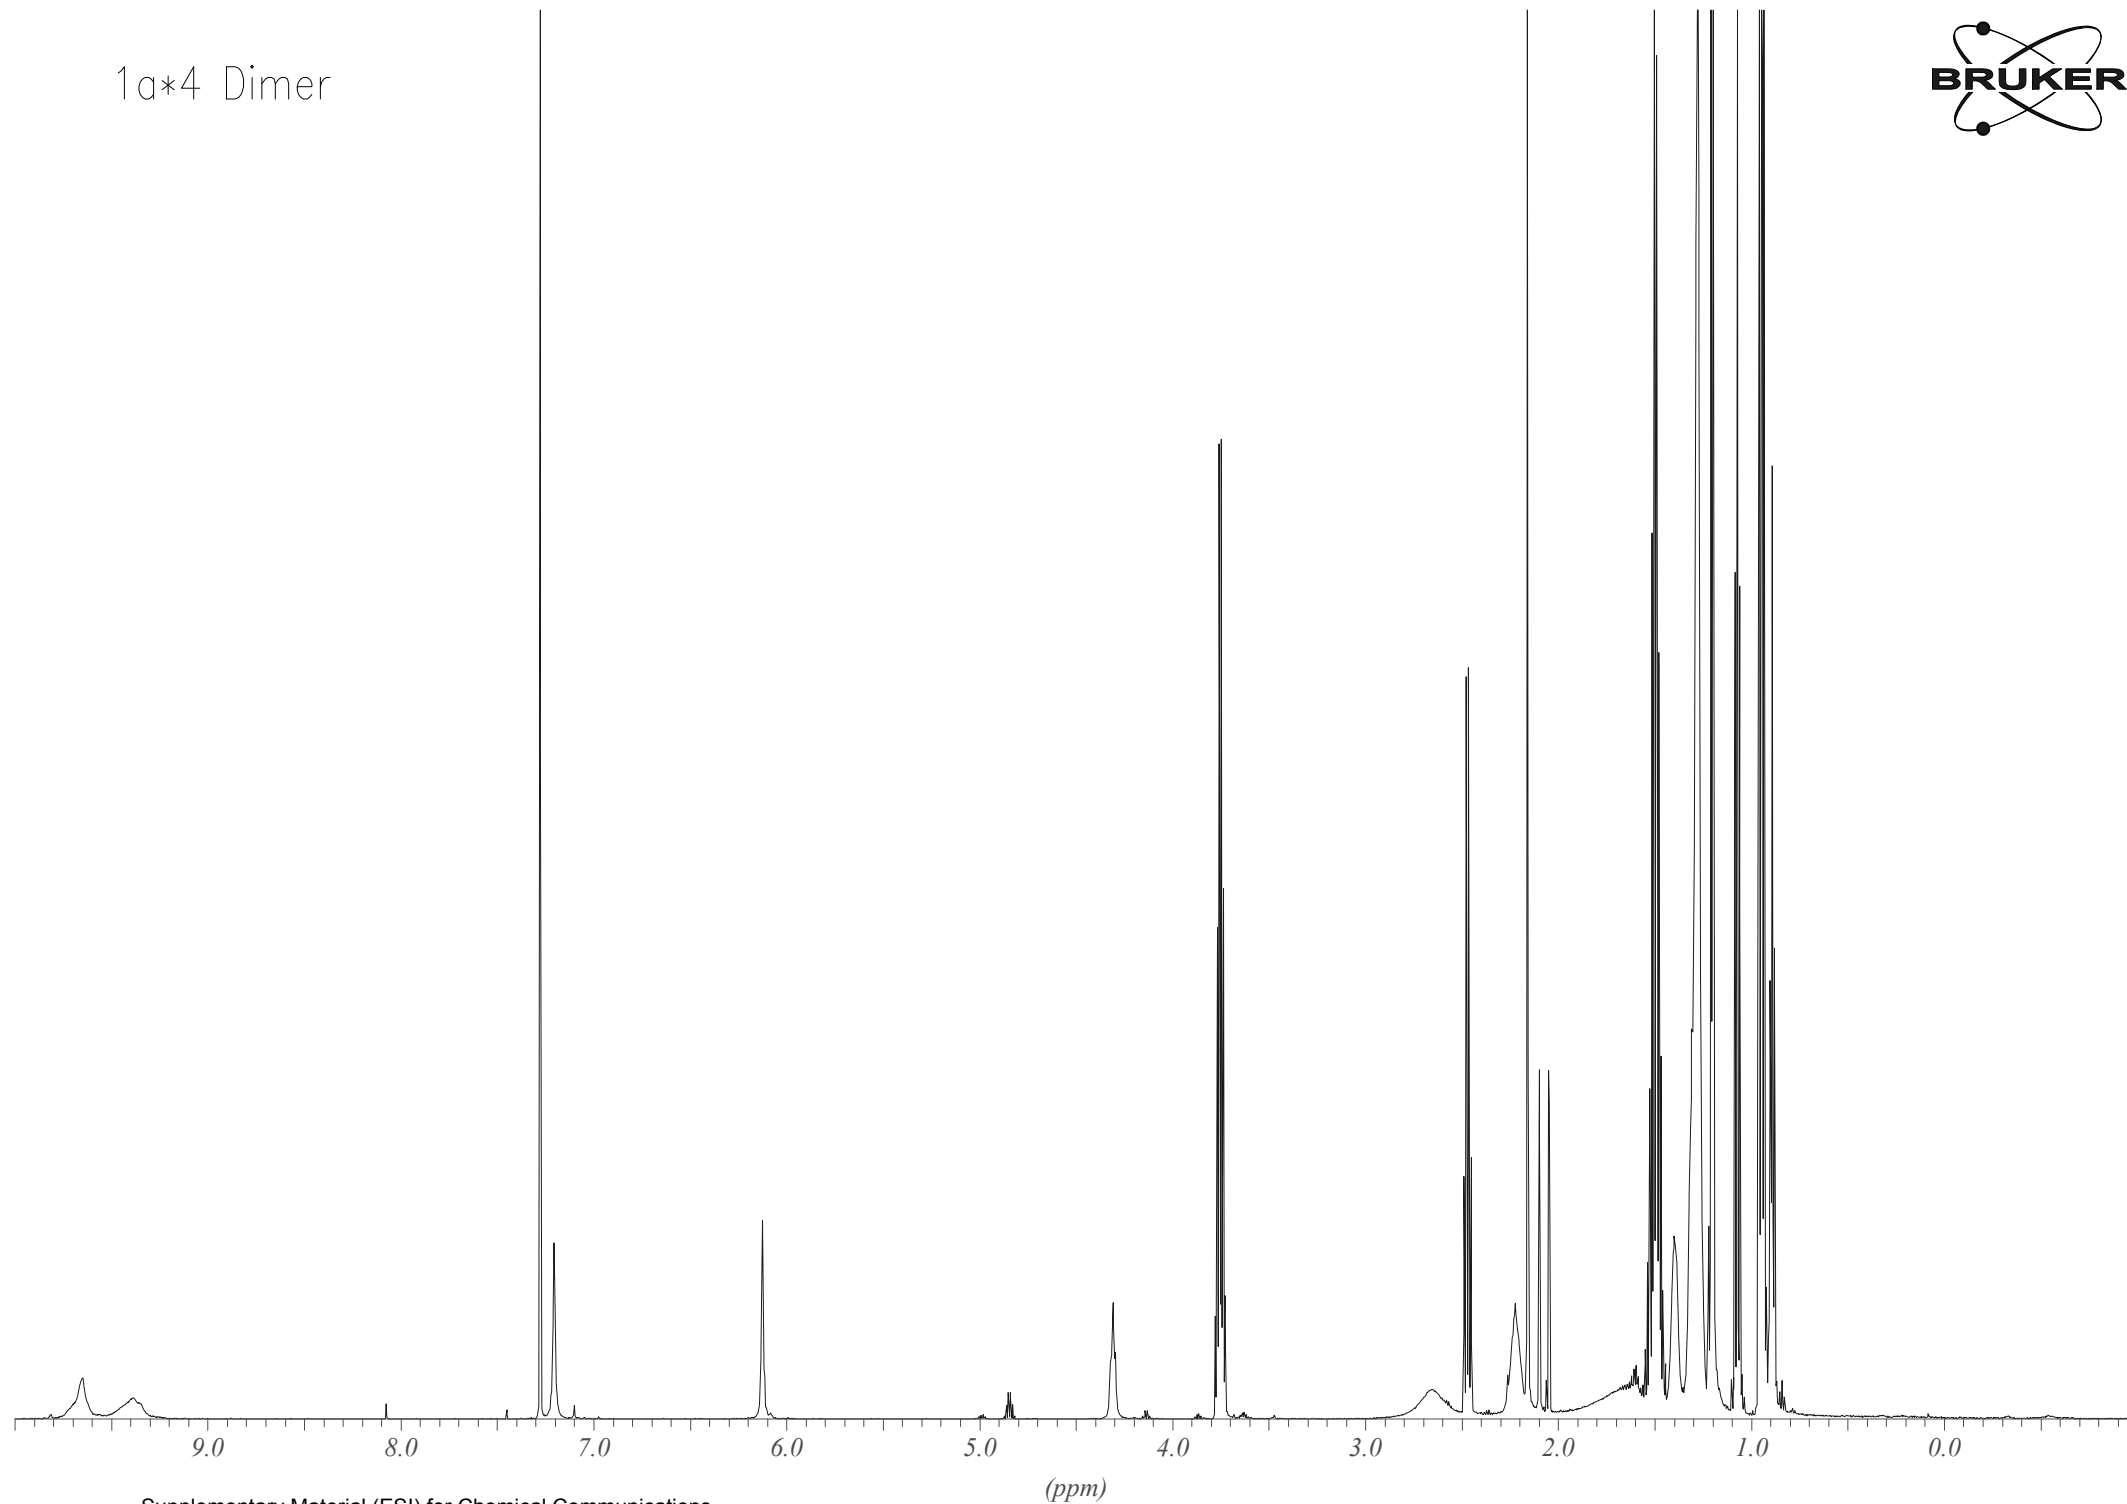

1a\*5 Hexamer

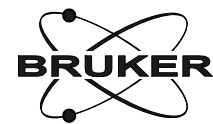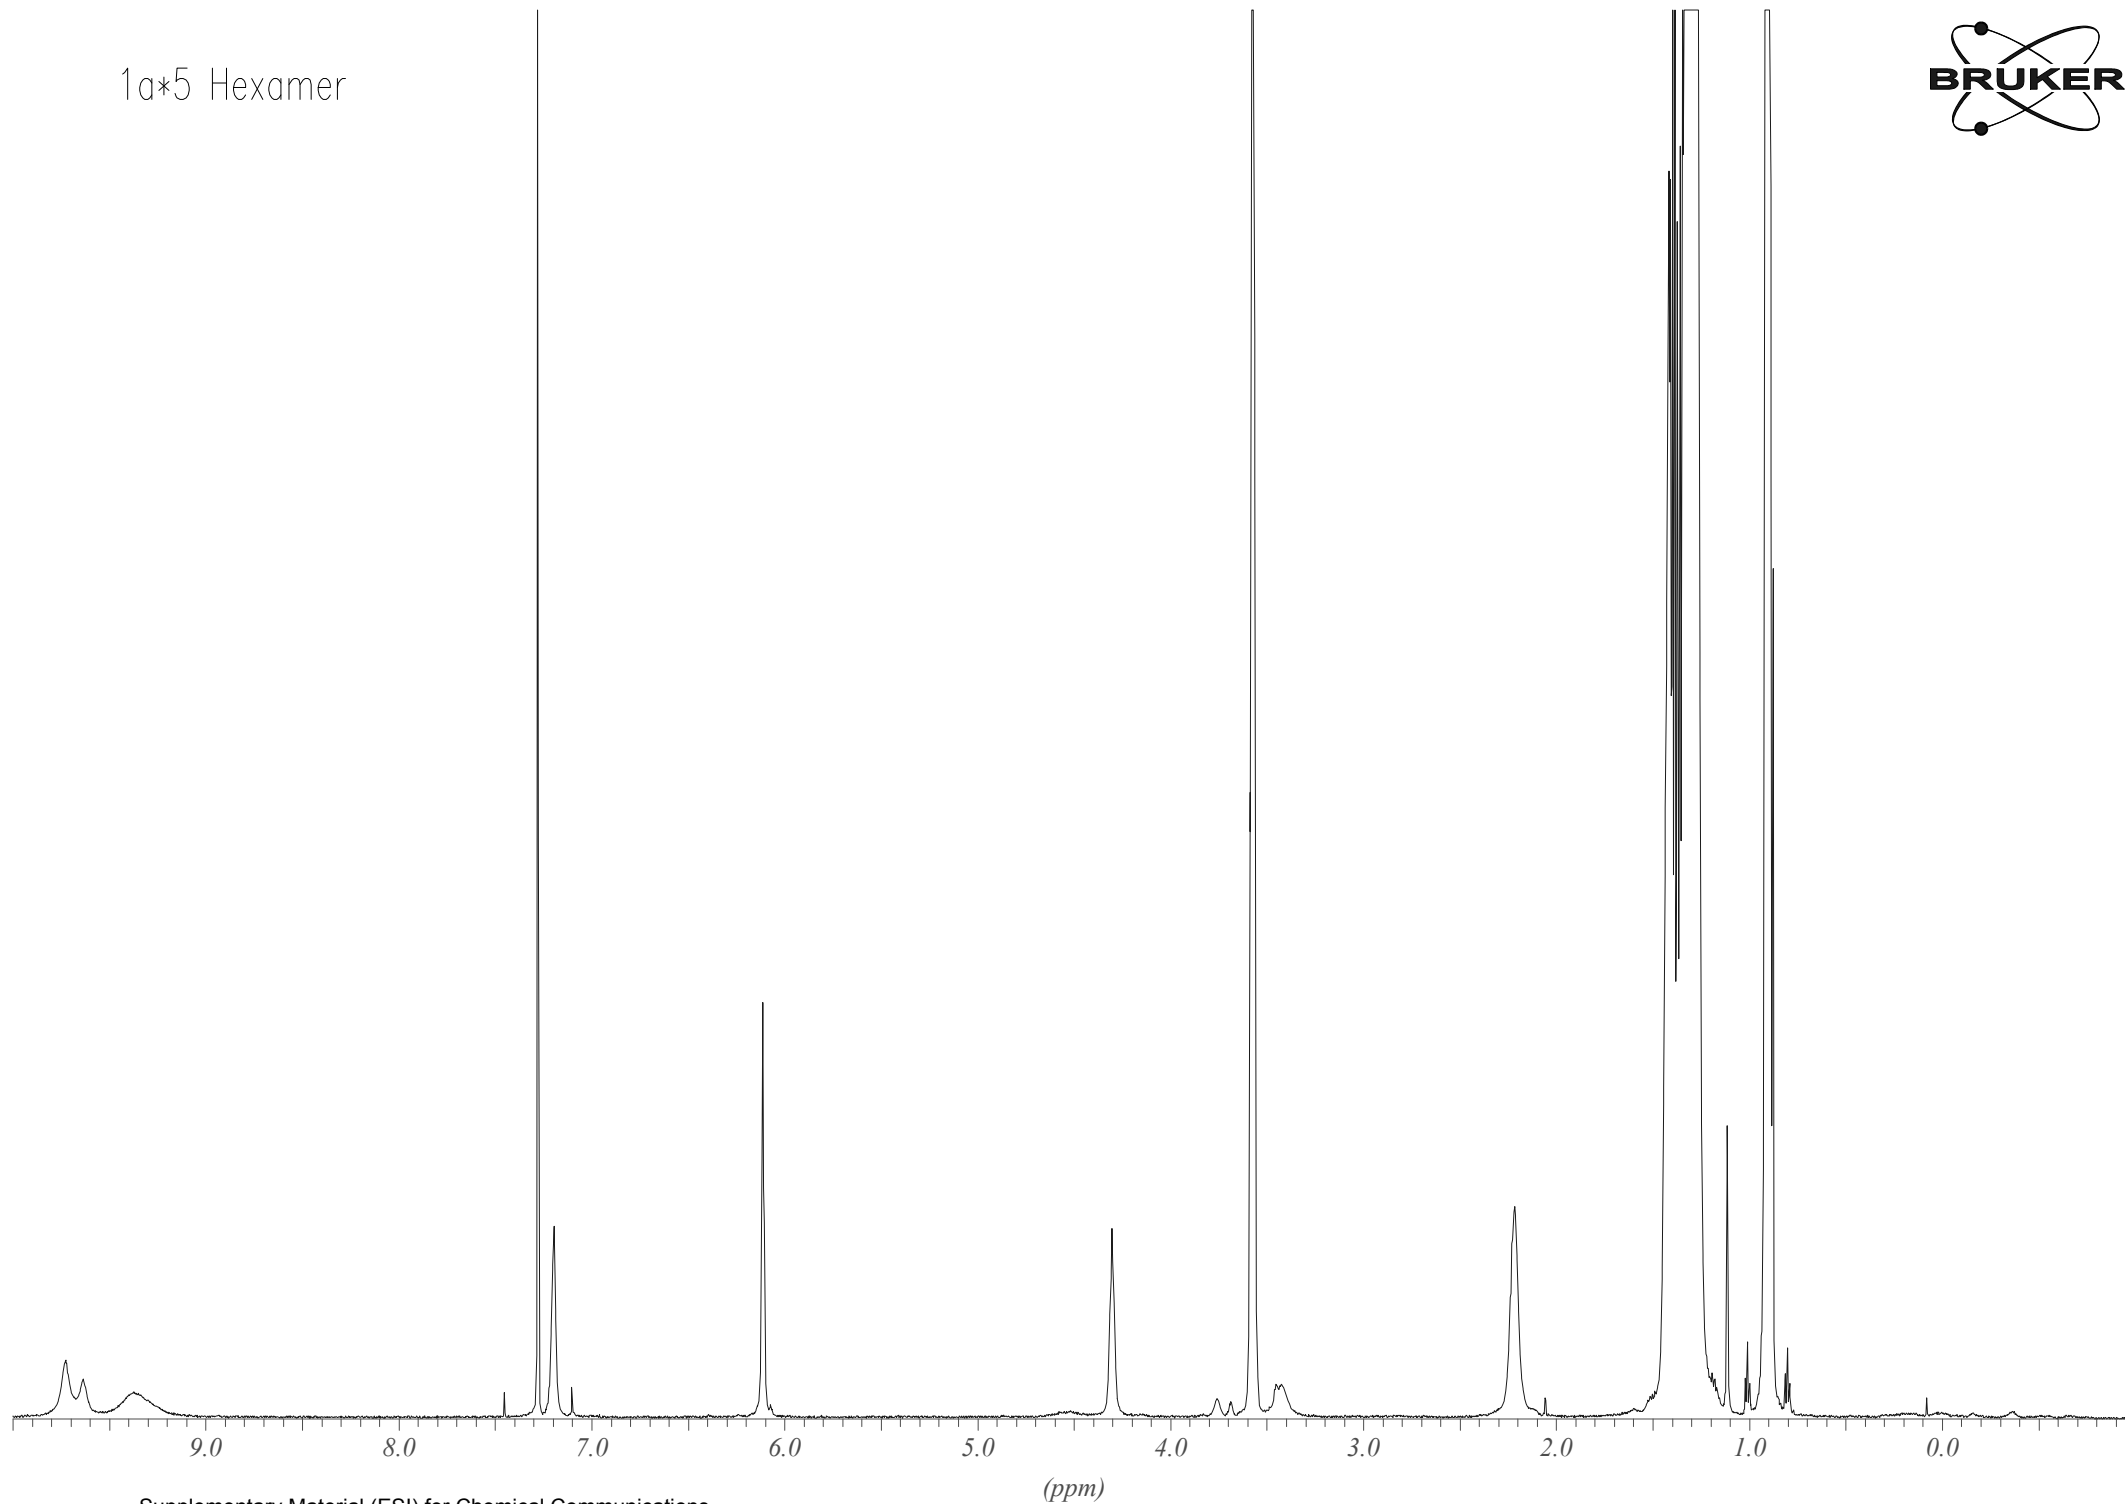

Supplement: b803890b.pdf [file b803890b.pdf]
